# Supplementary material for: A urinary metabolomics (GC-MS) strategy to evaluate the antidepressant-like effect of chlorogenic acid in adrenocorticotropic hormone-treated rats
Source: PubMed Central journal article supplement — RSC Adv. 2018 Mar 1;8(17):9141–51. doi: 10.1039/c8ra00074c (PMC9078588; doi:10.1039/c8ra00074c), 2018-03-01
Supplement: RA-008-C8RA00074C-s001.pdf [file RA-008-C8RA00074C-s001.pdf]

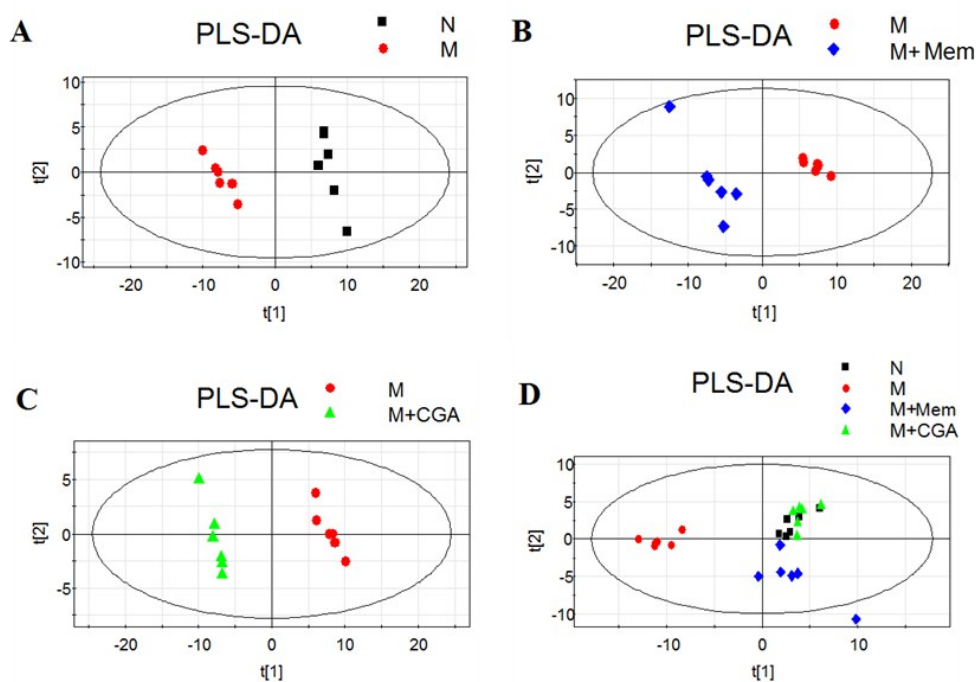

**Fig. S1** Scores plots of multivariate statistical analysis on urine samples. A. Partial least squares-discriminate analysis (PLS-DA) scores plot of normal (N) group versus model (M) group, B. PLS-DA scores plot of model (M) group versus memantine (M+Mem) group, C. PLS-DA scores plot of model (M) group versus chlorogenic acid (M+CGA) group, D. PLS-DA scores plot of N, M, M+Mem, M+CGA groups.

**Table S1 Automatic modeling parameters for assessing modeling quality of PCA, PLS-DA and OPLS (n=6 in each group)**

|                             |        | Amount of components | R <sup>2</sup> X | R <sup>2</sup> Y | Q <sup>2</sup> (cum) |
|-----------------------------|--------|----------------------|------------------|------------------|----------------------|
| M vs. N                     | PCA-X  | 2                    | 0.667            |                  | 0.466                |
|                             | PLS-DA | 2                    | 0.646            | 0.988            | 0.955                |
|                             | OPLS   | 2                    | 0.646            | 0.988            | 0.955                |
| M+Mem vs. M                 | PCA-X  | 2                    | 0.645            |                  | 0.347                |
|                             | PLS-DA | 3                    | 0.705            | 0.998            | 0.998                |
|                             | OPLS   | 2                    | 0.626            | 0.979            | 0.942                |
| M+CGA vs. M                 | PCA-X  | 2                    | 0.68             |                  | 0.466                |
|                             | PLS-DA | 2                    | 0.622            | 0.995            | 0.967                |
|                             | OPLS   | 2                    | 0.622            | 0.995            | 0.967                |
| N vs. M vs. M+Mem vs. M+CGA | PCA-X  | 2                    | 0.523            |                  | 0.377                |
|                             | PLS-DA | 6                    | 0.715            | 0.967            | 0.785                |

**Table S2 Differential metabolites among N, M, M+Mem, M+CGA comparison groups.**

| Metabolites          | RT(min) | Mass | M vs N                   |                  |                     | M+Mem vs. M |      |                    | M+CGA vs M  |      |                     |
|----------------------|---------|------|--------------------------|------------------|---------------------|-------------|------|--------------------|-------------|------|---------------------|
|                      |         |      | Fold change <sup>a</sup> | VIP <sup>b</sup> | T-test ( <i>p</i> ) | Fold change | VIP  | T-test( <i>p</i> ) | Fold change | VIP  | T-test ( <i>p</i> ) |
| Beta-alanine         | 7.31    | 102  | 0.51                     | 1.08             | 0.001               | 2.04        | 1.08 | 0.013              | 2.15        | 1.07 | 0.022               |
| 4-Aminobutanoic acid | 15.31   | 174  | 0.28                     | 1.01             | 0.008               | —           | —    | —                  | —           | —    | —                   |
| Propanedioic acid    | 7.48    | 147  | 0.54                     | 1.11             | 0.004               | 2.08        | 1.30 | 0.002              | 2.25        | 1.26 | 0.001               |
| Threonine            | 16.82   | 218  | 0.36                     | 1.31             | <0.001              | 2.63        | 1.00 | 0.015              | 2.48        | 1.01 | 0.030               |
| Serine               | 9.86    | 218  | 0.47                     | 1.01             | 0.019               | 1.90        | 1.13 | <0.001             | 3.42        | 1.10 | 0.004               |
| Galactose            | 17.55   | 117  | 0.41                     | 1.07             | 0.010               | —           | —    | —                  | —           | —    | —                   |
| Myo-inositol         | 25.99   | 217  | 0.32                     | 1.21             | 0.002               | 3.06        | 1.15 | 0.006              | 3.99        | 1.31 | <0.001              |
| D-lactic acid        | 5.38    | 117  | 0.32                     | 1.10             | 0.019               | —           | —    | —                  | —           | —    | —                   |
| Acetic acid          | 5.61    | 177  | 0.36                     | 1.31             | <0.001              | 3.47        | 1.41 | <0.001             | 3.47        | 1.29 | <0.001              |
| Urea                 | 7.12    | 171  | 0.29                     | 1.20             | 0.003               | —           | —    | —                  | —           | —    | —                   |
| Creatinine           | 13.65   | 115  | 0.21                     | 1.36             | <0.001              | 5.97        | 1.39 | <0.001             | 4.76        | 1.25 | <0.001              |
| Proline              | 8.88    | 142  | 0.31                     | 1.07             | 0.001               | 4.60        | 1.13 | 0.011              | —           | —    | —                   |
| Oxalic acid          | 6.42    | 117  | 0.47                     | 1.06             | 0.017               | 2.08        | 1.25 | 0.003              | 2.76        | 1.30 | <0.001              |
| Ascorbic acid        | 33.59   | 332  | 0.29                     | 1.29             | 0.017               | —           | —    | —                  | —           | —    | —                   |
| Asparagine           | 12.57   | 128  | 0.30                     | 1.18             | 0.007               | 4.07        | 1.27 | 0.005              | —           | —    | —                   |
| Alpha-alanine        | 6.01    | 116  | 0.34                     | 1.18             | 0.006               | 2.55        | 1.09 | 0.010              | 2.90        | 1.09 | 0.014               |
| Hippurate            | 19.40   | 105  | 11.05                    | 1.29             | <0.001              | 0.05        | 1.38 | <0.001             | 0.11        | 1.27 | <0.001              |
| Ferulic acid         | 25.80   | 338  | 77.50                    | 1.10             | 0.009               | 68.90       | 1.20 | 0.042              | 2.50        | 1.08 | 0.009               |
| Kynurenic acid       | 25.43   | 318  | 0.40                     | 1.15             | 0.015               | 2.37        | 1.26 | <0.001             | 2.10        | 1.01 | 0.014               |

a. Values greater than 1 indicate higher levels in M group relative to N group; values less than 1 indicate higher levels in N group relative to M group, this comparison method was also applicable in other groups.

b. Variable importance in the projection (VIP) was obtained from OPLS-DA with a threshold of 1.0. The short dash line (-) indicates no significant variation
